# Supplementary material for: Diet Supplementation with NUTRIOSE, a Resistant Dextrin, Increases the Abundance of Parabacteroides distasonis in the Human Gut
Source: PubMed Central journal article supplement — Mol Nutr Food Res. 2022 Apr 4;66(11):2101091. doi: 10.1002/mnfr.202101091 (PMC9287035; doi:10.1002/mnfr.202101091), 2022-04-04
Supplement: MNFR-66-0-s001.pdf [file MNFR-66-0-s001.pdf]

## Supplementary data

Supplementary Table 1: Evolution of diet during the intervention.

Supplementary Figure 1: Characteristics of the individuals from the Resistant Dextrin (RD) group.

Supplementary Figure 2: Presence/absence of genes from Parabacteroides distasonis in the individuals from the RD group.

Supplementary Figure 3: Profiles of susD and susC.

Supplementary Figure 4: P. distasonis log-fold change comparison.

**Supplementary Table 1: Evolution of diet during the intervention.**

|                                            | RD <sup>a</sup> (baseline) | CP <sup>b</sup> (baseline) | RD (D42)   | CP (D42)   | RD log fold-change | CP log fold-change | P <sup>c</sup> | Q <sup>d</sup> |
|--------------------------------------------|----------------------------|----------------------------|------------|------------|--------------------|--------------------|----------------|----------------|
| Energy ± SD (kcal/d)                       | 1800 ± 440                 | 1800 ± 440                 | 1900 ± 550 | 1800 ± 610 | 0.01               | -0.028             | 0.47           | 1              |
| Carbohydrates ± SD (g/d)                   | 200 ± 70                   | 210 ± 68                   | 200 ± 86   | 210 ± 89   | -0.059             | -0.069             | 0.82           | 1              |
| Proteins ± SD (g/d)                        | 76 ± 18                    | 79 ± 20                    | 80 ± 22    | 79 ± 29    | 0.05               | -0.052             | 0.34           | 1              |
| Lipids ± SD (g/d)                          | 80 ± 19                    | 74 ± 19                    | 82 ± 31    | 76 ± 29    | -0.0064            | -0.023             | 0.62           | 1              |
| Percentage of energy from alcohol ± SD (%) | 1.3 ± 2.6                  | 1.2 ± 2                    | 2.2 ± 4    | 1.4 ± 2.8  | NaN                | NaN                | 0.18           | 1              |
| Water ± SD (ml/d)                          | 3500 ± 670                 | 4100 ± 1100                | 3800 ± 650 | 4000 ± 810 | 0.12               | -0.021             | 0.21           | 1              |
| Fiber ± SD (g/d)                           | 15 ± 7.3                   | 19 ± 9.4                   | 18 ± 8.2   | 16 ± 9.5   | 0.28               | -0.26              | <b>0.00039</b> | <b>0.0027</b>  |

a) RD = Resistant Dextrin

b) CP = Control Product

d) P-value associated with the non-parametric longitudinal data test.

e) P-value corrected for multiple testing with the Benjamini-Hochberg procedure.

### Supplementary Figure 1: Characteristics of the individuals from the RD group.

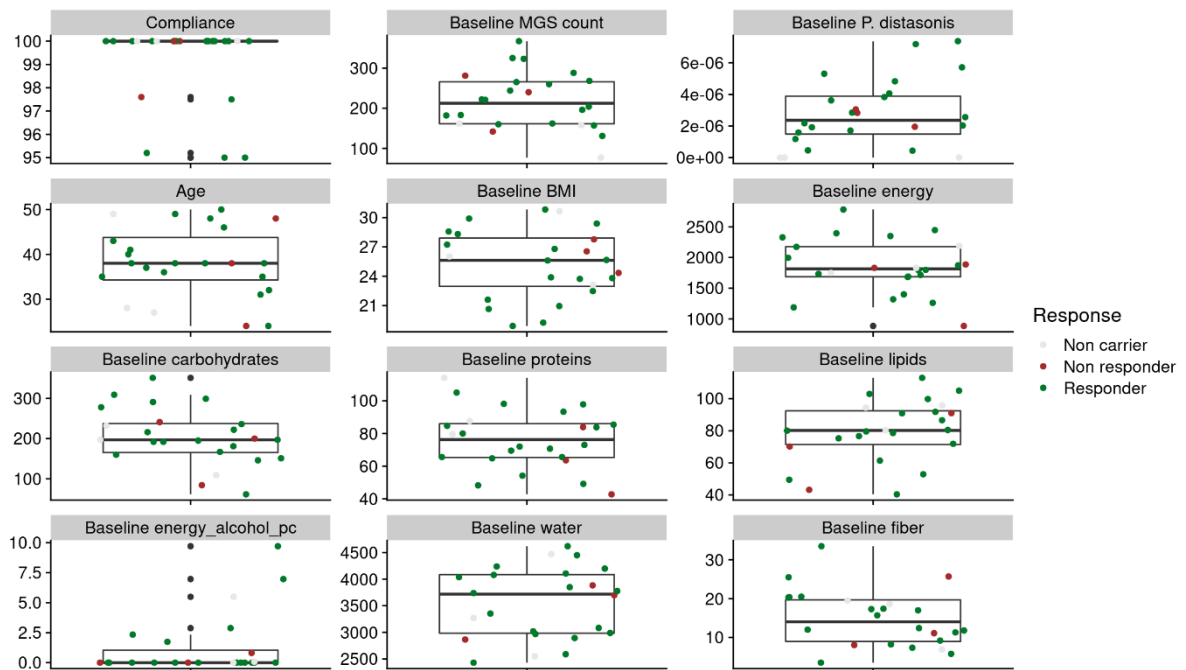

**Supplementary Figure 1:** Distribution of different characteristics in individuals from the RD group according to their response status: non-carriers (individuals without *Parabacteroides distasonis*), non-responders (individuals whose *P. distasonis* abundance does not increase), and responders (individuals whose *P. distasonis* abundance increases). RD = Resistant dextrin

**Supplementary Figure 2: Presence/absence of genes from *Parabacteroides distasonis* in the individuals from the RD group.**

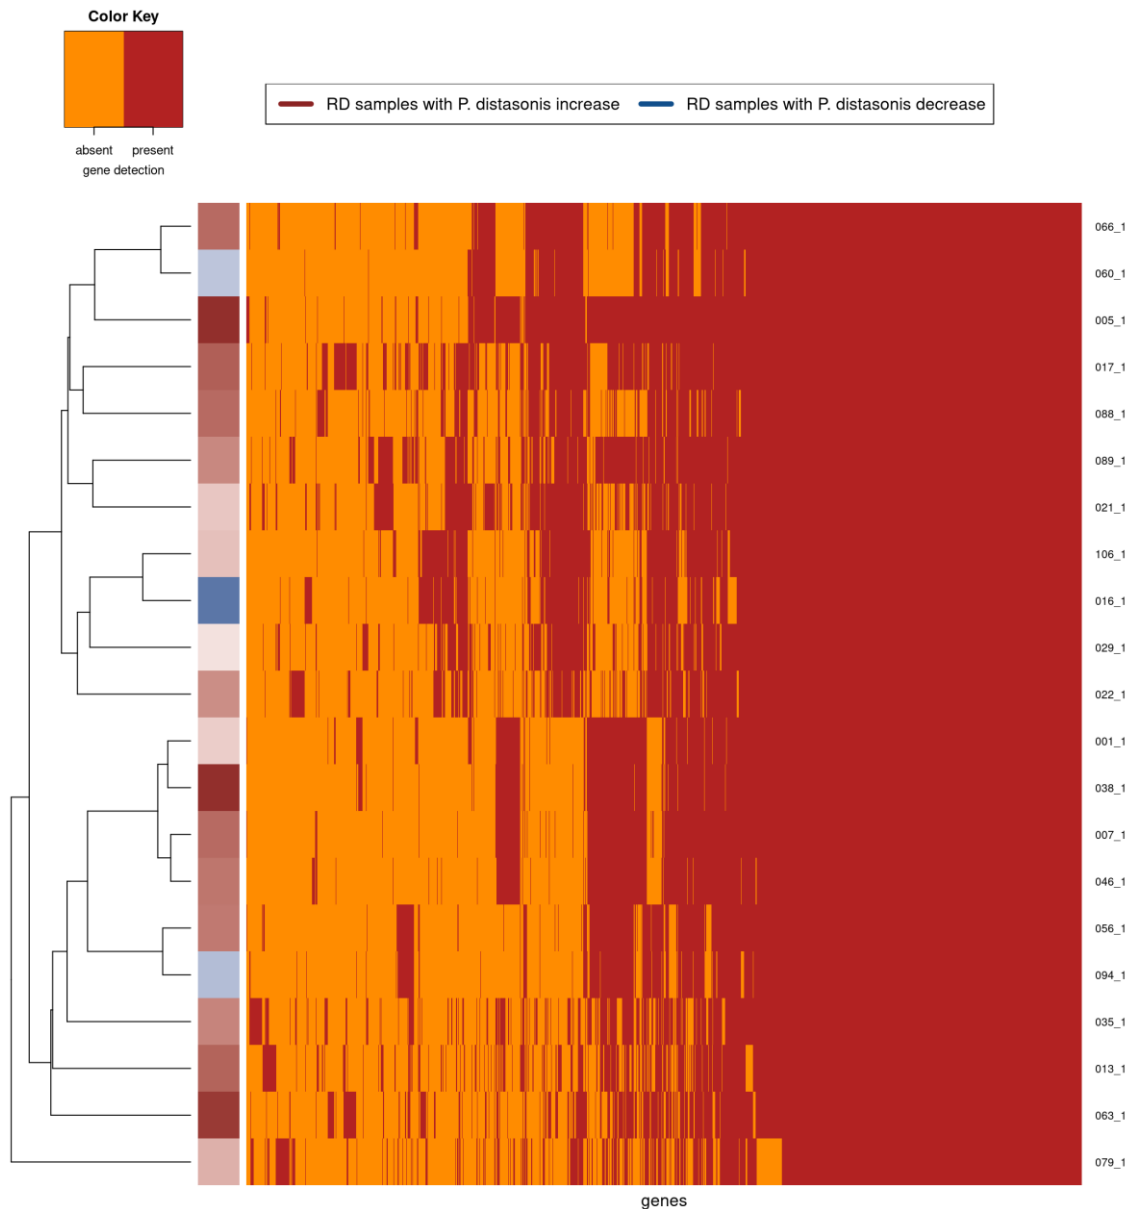

**Supplementary Figure 2:** Genes from the *P. distasonis* pangenome are displayed (in column) and colored according to their presence/absence in a given individual (in rows). Presence/absence of a gene in an individual is assessed considering both time points altogether (baseline and D42). Only individuals from the RD group carrying *P. distasonis* are shown (n =21). Individuals are clustered according to their gene content. The left side bar indicates *P. distasonis* log-fold change, from dark blue (highest decrease) to dark red (highest increase). *RD* = *Resistant dextrin*

### Supplementary Figure 3: Profiles of susD and susC

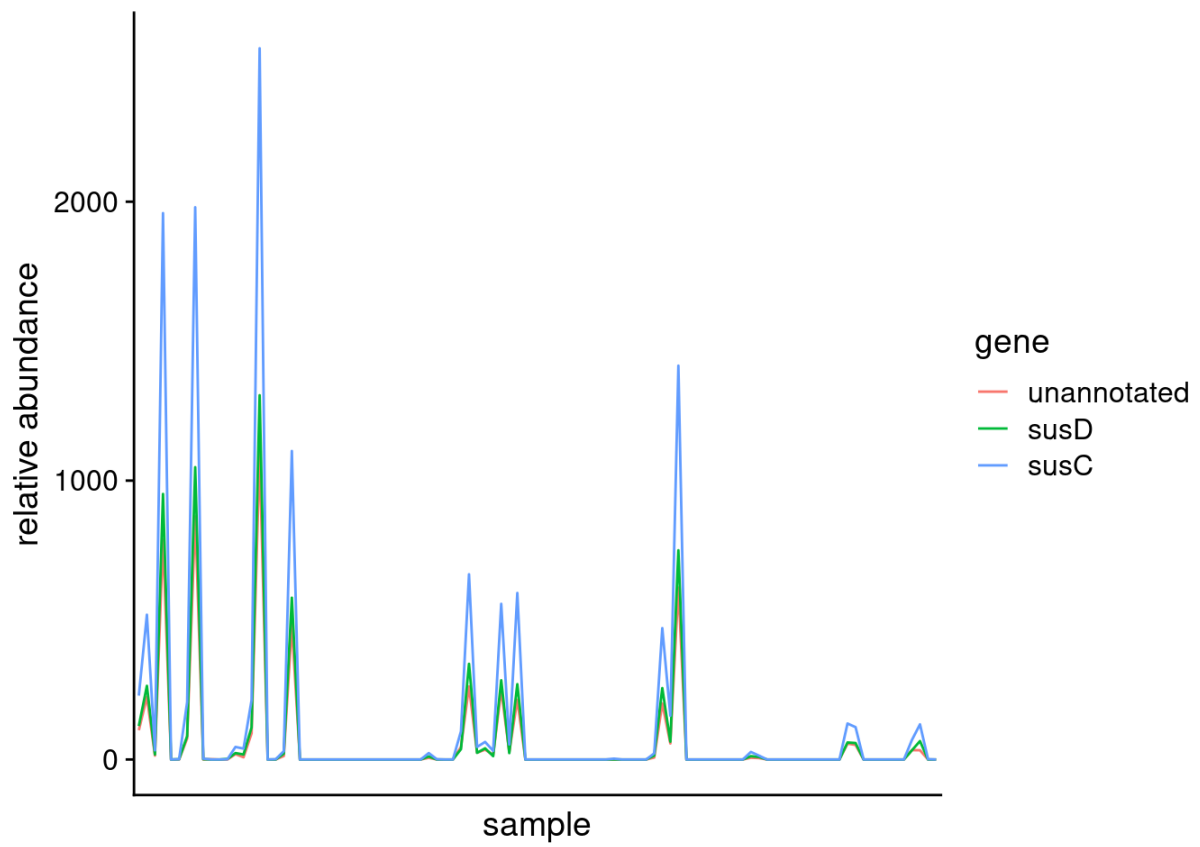

**Supplementary Figure 3:** Comparison between relative abundance profiles of the genes from *P. distasonis* (susD and unannotated) whose presence in individuals is associated with *P. distasonis* log<sub>2</sub>FC, and the gene annotated as susC that is absent from the automatic clustering of *P. distasonis*.

**Supplementary Figure 4: *P. distasonis* log-fold change comparison**

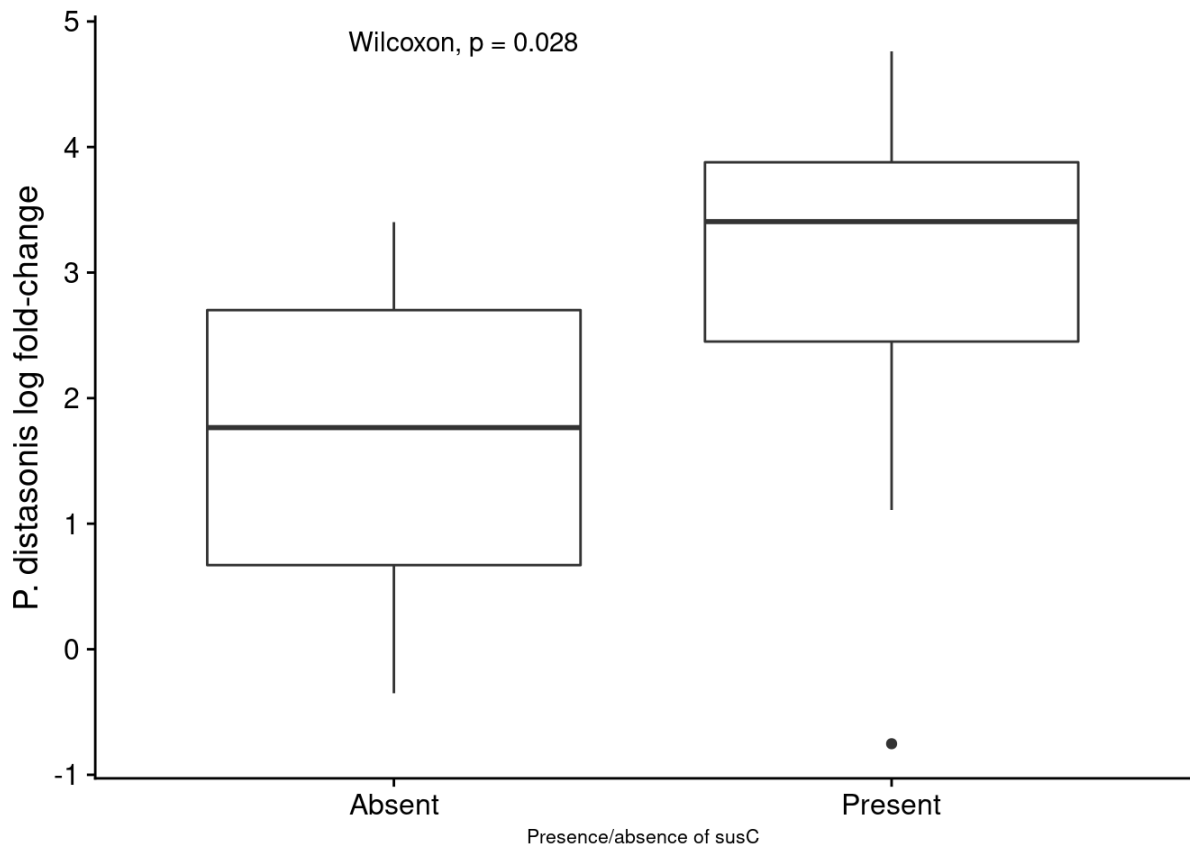

**Supplementary Figure 4:** *P. distasonis* log<sub>2</sub>FC according to the presence/absence of both genes annotated as susC (both genes are present in the same individuals).
